# Supplementary material
Source: PubMed Central journal article supplement (PMC9260412)
Supplement: mmc1.pdf [file mmc1.pdf]

**Cell Host & Microbe, Volume 30**

**Supplemental information**

**SARS-CoV-2 Omicron sublineages exhibit  
distinct antibody escape patterns**

**Henning Gruell, Kanika Vanshylla, Michael Korenkov, Pinkus Tober-Lau, Matthias Zehner, Friederike Münn, Hanna Janicki, Max Augustin, Philipp Schommers, Leif Erik Sander, Florian Kurth, Christoph Kreer, and Florian Klein**

**Figure S1**

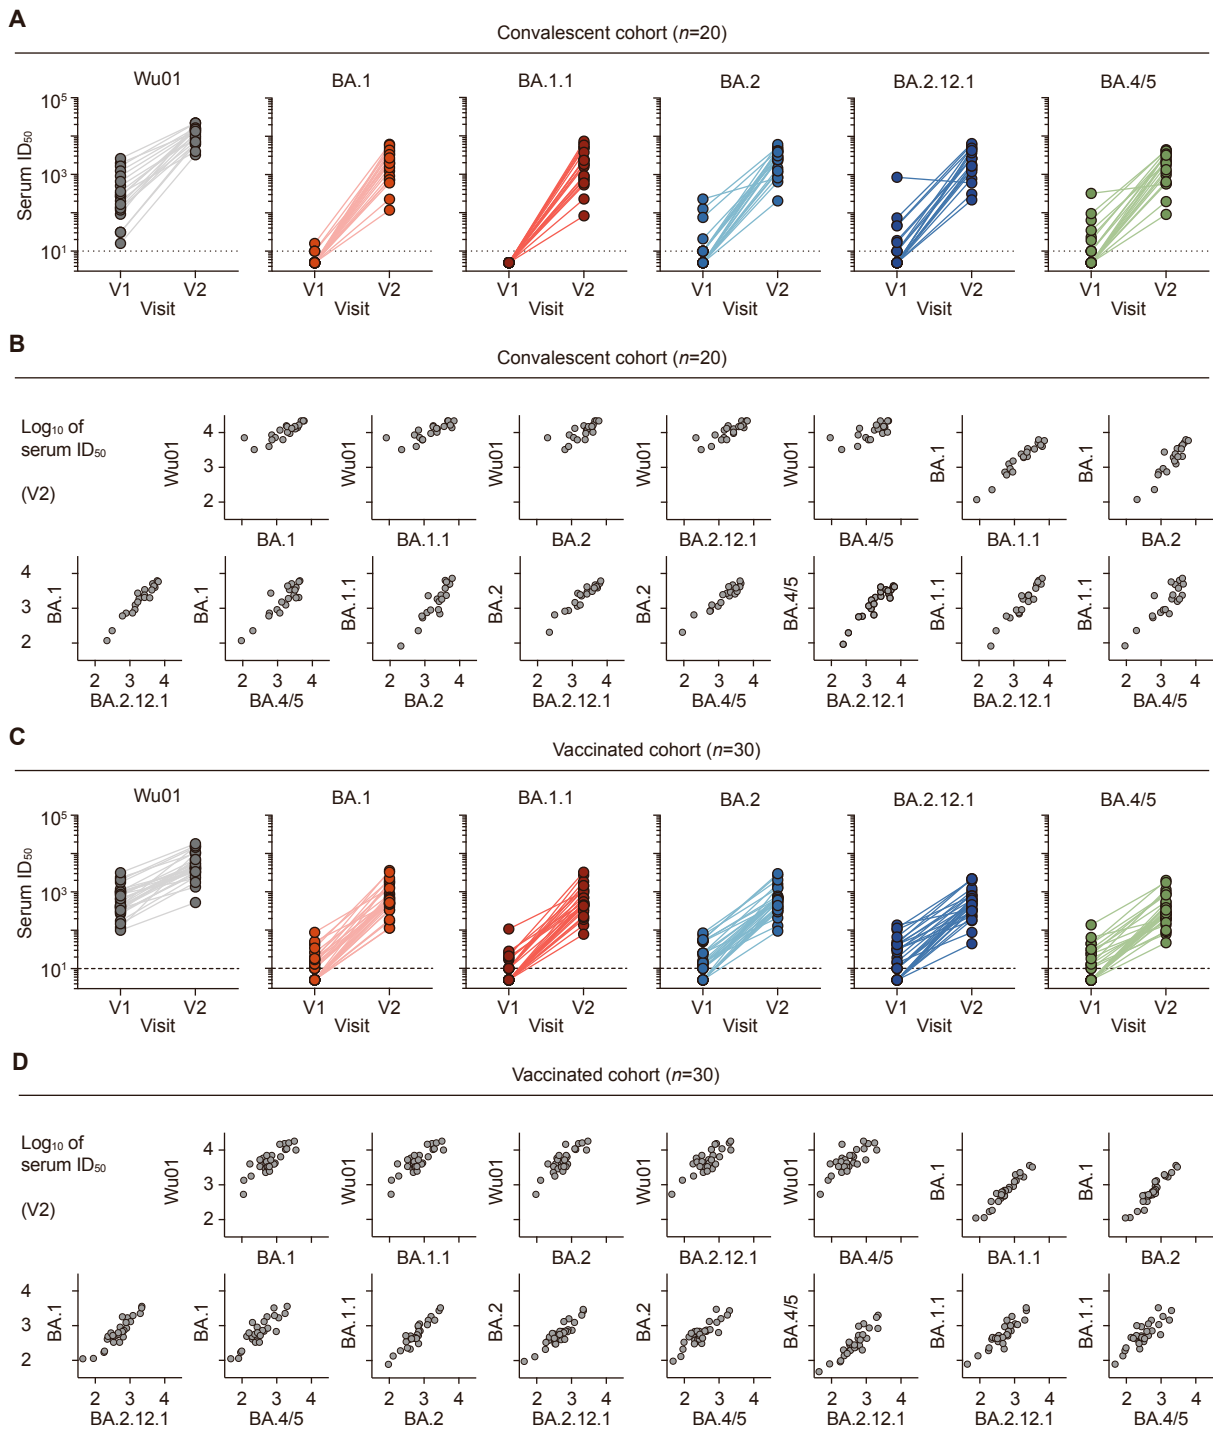

**Figure S1. Serum neutralization of Omicron sublineages, Related to Figure 2**

(A) Serum ID<sub>50</sub>s in convalescent individuals after infection (V1) and BNT162b2 booster immunization (V2) as in Figure 2. Solid lines connect ID<sub>50</sub>s of individual participants; dashed lines indicate lower limit of quantification (LLOQ, ID<sub>50</sub>=10). (B) Correlation plots of log<sub>10</sub> serum ID<sub>50</sub>s against indicated viruses in convalescent individuals at V2. (C) Serum ID<sub>50</sub>s in the cohort of BNT162b2-vaccinated individuals after the second (V1) and third vaccine doses (V2) as in Figure 2. Solid lines connect ID<sub>50</sub>s of individual participants; dashed lines indicate lower limit of quantification (LLOQ, ID<sub>50</sub>=10). (D) Correlation plots of log<sub>10</sub> serum ID<sub>50</sub>s against indicated viruses in vaccinated individuals at V2. In A and C, Serum ID<sub>50</sub>s <LLOQ were imputed to ½x LLOQ (ID<sub>50</sub>=5).



**Figure S3**

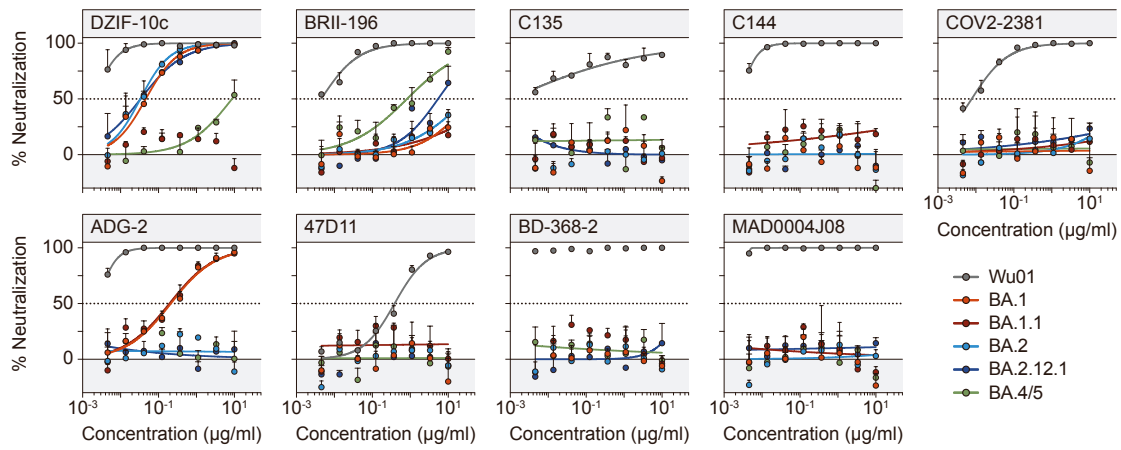

**Figure S3. Omicron sublineage neutralizing activity of monoclonal antibodies in clinical testing, Related to Figure 4**  
Neutralization dose response curves in a pseudovirus neutralization assay. Circles show averages and error bars indicate standard deviation. Dotted lines indicate 50% neutralization ( $\text{IC}_{50}$ ).

**Table S1 - Study cohorts, Related to Figure 2**

| <b>A Convalescent cohort</b>                                         |                        |
|----------------------------------------------------------------------|------------------------|
| <b>Demographics</b>                                                  |                        |
| Participants - <i>n</i>                                              | 20                     |
| <b>Gender</b>                                                        |                        |
| Female - <i>n</i> (%)                                                | 11 (55%)               |
| Male - <i>n</i> (%)                                                  | 9 (45%)                |
| Age - median years (IQR; range)                                      | 51 (35-60; 25-73)      |
| <b>Reported comorbidities</b>                                        |                        |
| Asthma - <i>n</i> (%)                                                | 3 (15%)                |
| Arterial hypertension - <i>n</i> (%)                                 | 2 (10%)                |
| Malignancy - <i>n</i> (%)                                            | 2 (10%)                |
| Gastroesophageal reflux disease - <i>n</i> (%)                       | 1 (5%)                 |
| <b>Infection</b>                                                     |                        |
| Period of SARS-CoV-2 infection                                       | February - April 2020  |
| <b>COVID-19 severity</b>                                             |                        |
| Mild symptoms - <i>n</i> (%)                                         | 19 (95%)               |
| Asymptomatic - <i>n</i> (%)                                          | 1 (5%)                 |
| <b>Vaccination</b>                                                   |                        |
| Vaccine                                                              | BNT162b2               |
| Time between infection and vaccination -<br>median days (IQR; range) | 428 (411-449; 392-483) |
| <b>Study visits</b>                                                  |                        |
| Sampling time point - median days (IQR; range)                       |                        |
| V1 (after disease onset)                                             | 48 (34-58; 22-75)      |
| V2 (after vaccination)                                               | 33 (27-52; 23-68)      |
| <b>B Vaccine cohort</b>                                              |                        |
| <b>Demographics</b>                                                  |                        |
| Participants - <i>n</i>                                              | 30                     |
| <b>Gender</b>                                                        |                        |
| Female - <i>n</i> (%)                                                | 18 (60%)               |
| Male - <i>n</i> (%)                                                  | 12 (40%)               |
| Age - median years (IQR; range)                                      | 33 (29-43; 21-59)      |
| <b>Reported comorbidities</b>                                        |                        |
| Allergic rhinitis - <i>n</i> (%)                                     | 11 (37%)               |
| Asthma - <i>n</i> (%)                                                | 3 (10%)                |
| Gynecologic disease - <i>n</i> (%)                                   | 3 (10%)                |
| Cardiovascular disease - <i>n</i> (%)                                | 2 (6%)                 |
| Diabetes - <i>n</i> (%)                                              | 2 (6%)                 |
| Hypothyroidism - <i>n</i> (%)                                        | 1 (3%)                 |
| Chronic liver/Intestinal disease - <i>n</i> (%)                      | 1 (3%)                 |
| Neurological disorder - <i>n</i> (%)                                 | 1 (3%)                 |
| <b>Vaccination</b>                                                   |                        |
| Vaccine                                                              | BNT162b2               |
| Time between first and second dose -<br>median days (IQR; range)     | 21 (21-21; 21-28)      |
| Time between second and third dose -<br>median days (IQR; range)     | 274 (267-286; 173-307) |
| <b>Study visits</b>                                                  |                        |
| Sampling time point - median days (IQR; range)                       |                        |
| V1 (after second dose)                                               | 28 (27-32; 20-49)      |
| V2 (after third dose)                                                | 29 (26-35; 21-57)      |

**Table S2 - Human monoclonal antibody panel analysis, Related to Figure 3**

| #  | Name         | Epitope | Pseudovirus IC <sub>50</sub> (µg/ml) |       |        |       |           | Heavy chain |        |                         |                        | Light chain            |        |                         |                        | Donor | Ref.         |                        |
|----|--------------|---------|--------------------------------------|-------|--------|-------|-----------|-------------|--------|-------------------------|------------------------|------------------------|--------|-------------------------|------------------------|-------|--------------|------------------------|
|    |              |         | Wu01                                 | BA.1  | BA.1.1 | BA.2  | BA.2.12.1 | BA.4/5      | V gene | GL id. (%) <sup>a</sup> | # aa mut. <sup>b</sup> | CDR3 # aa <sup>c</sup> | V gene | GL id. (%) <sup>a</sup> | # aa mut. <sup>b</sup> |       |              | CDR3 # aa <sup>c</sup> |
| 1  | 2-7          | RBD     | 0.022                                | >10   | >10    | 0.296 | 0.333     | 0.292       | 2-5    | 100.0                   | 0                      | 11                     | L2-14  | 93.9                    | 6                      | 9     | Fab2         | 1                      |
| 2  | 2-15         | RBD     | <0.005                               | >10   | >10    | >10   | >10       | >10         | 1-2    | 95.9                    | 4                      | 22                     | L2-14  | 95.9                    | 4                      | 10    | Fab2         | 1                      |
| 3  | 2-30         | RBD     | 0.775                                | >10   | >10    | >10   | >10       | >10         | 3-30   | 96.9                    | 3                      | 12                     | K1-9   | 95.8                    | 4                      | 9     | Fab2         | 1                      |
| 4  | 2-36         | RBD     | 0.062                                | >10   | 9.885  | >10   | >10       | >10         | 4-61   | 96.0                    | 4                      | 20                     | K3-20  | 100.0                   | 0                      | 9     | Fab2         | 1                      |
| 5  | 2-38         | RBD     | 2.059                                | >10   | >10    | >10   | >10       | >10         | 3-21   | 99.0                    | 1                      | 14                     | L3-19  | 96.8                    | 3                      | 9     | Fab2         | 1                      |
| 6  | 2-43         | RBD     | 3.779                                | >10   | >10    | >10   | >10       | >10         | 1-2    | 98.0                    | 2                      | 22                     | L2-14  | 96.9                    | 3                      | 10    | Fab2         | 1                      |
| 7  | 4-20         | RBD     | 0.029                                | >10   | >10    | >10   | >10       | >10         | 1-46   | 95.9                    | 4                      | 13                     | K1-39  | 97.9                    | 2                      | 10    | Fab4         | 1                      |
| 8  | B38          | RBD     | 1.000                                | >10   | >10    | >10   | >10       | >10         | 3-53   | 99.0                    | 1                      | 9                      | K1-9   | 97.9                    | 2                      | 10    | n.a.         | 2                      |
| 9  | Bamlanivimab | RBD     | <0.005                               | >10   | >10    | >10   | >10       | >10         | 1-69   | 99.0                    | 1                      | 18                     | K1-39  | 97.9                    | 2                      | 9     | n.a.         | 3                      |
| 10 | BD-236       | RBD     | 0.018                                | >10   | >10    | >10   | >10       | >10         | 3-53   | 96.9                    | 3                      | 12                     | K1-9   | 96.8                    | 3                      | 9     | Patient 1-64 | 4                      |
| 11 | BD-368-2     | RBD     | <0.005                               | >10   | >10    | >10   | >10       | >10         | 3-23   | 90.8                    | 9                      | 18                     | K2-28  | 100.0                   | 0                      | 9     | Patient 1-64 | 4                      |
| 12 | BD23         | RBD     | 0.831                                | >10   | >10    | >10   | >10       | >10         | 7-4-1  | 100.0                   | 0                      | 19                     | K1-5   | 100.0                   | 0                      | 9     | Patient 1-64 | 4                      |
| 13 | C002         | RBD     | <0.005                               | >10   | >10    | >10   | >10       | >10         | 3-30   | 98.0                    | 2                      | 17                     | K1-39  | 98.9                    | 1                      | 9     | COV21        | 5                      |
| 14 | C022         | RBD     | 0.203                                | >10   | >10    | >10   | >10       | >10         | 4-39   | 97.0                    | 3                      | 21                     | K1-5   | 97.9                    | 2                      | 9     | COV21        | 5                      |
| 15 | C101         | RBD     | 0.016                                | >10   | >10    | >10   | >10       | >10         | 3-53   | 94.8                    | 5                      | 11                     | K3-20  | 96.9                    | 3                      | 9     | COV107       | 5                      |
| 16 | C102         | RBD     | 0.027                                | >10   | >10    | >10   | >10       | >10         | 3-53   | 96.9                    | 3                      | 11                     | K3-20  | 100.0                   | 0                      | 9     | COV107       | 5                      |
| 17 | C104         | RBD     | 0.046                                | >10   | >10    | >10   | >10       | >10         | 4-34   | 93.8                    | 6                      | 17                     | K3-20  | 94.8                    | 5                      | 9     | COV107       | 5                      |
| 18 | C105         | RBD     | 0.058                                | >10   | >10    | >10   | >10       | >10         | 3-53   | 99.0                    | 1                      | 12                     | L2-8   | 98.0                    | 2                      | 11    | COV107       | 5                      |
| 19 | C123         | RBD     | 0.137                                | >10   | >10    | >10   | >10       | >10         | 3-53   | 97.9                    | 2                      | 10                     | K1-9   | 100.0                   | 0                      | 9     | COV107       | 5                      |
| 20 | C125         | RBD     | 0.021                                | >10   | >10    | >10   | >10       | >10         | 1-58   | 99.0                    | 1                      | 16                     | K3-20  | 100.0                   | 0                      | 9     | COV107       | 5                      |
| 21 | C128         | RBD     | 0.295                                | >10   | >10    | >10   | >10       | >10         | 3-23   | 90.7                    | 9                      | 18                     | K3-20  | 93.7                    | 6                      | 10    | COV072       | 5                      |
| 22 | C135         | RBD     | <0.005                               | >10   | >10    | >10   | >10       | >10         | 3-30   | 95.9                    | 4                      | 12                     | K1-5   | 96.8                    | 3                      | 9     | COV072       | 5                      |
| 23 | C140         | RBD     | 0.020                                | >10   | >10    | >10   | >10       | >10         | 3-66   | 94.8                    | 5                      | 11                     | K1-9   | 100.0                   | 0                      | 9     | COV072       | 5                      |
| 24 | C144         | RBD     | <0.005                               | >10   | >10    | >10   | >10       | >10         | 3-53   | 96.9                    | 3                      | 25                     | L2-14  | 99.0                    | 1                      | 10    | COV047       | 5                      |
| 25 | C155         | RBD     | 0.009                                | >10   | >10    | >10   | >10       | >10         | 3-53   | 97.9                    | 2                      | 11                     | K3-15  | 98.9                    | 1                      | 9     | COV047       | 5                      |
| 26 | C165         | RBD     | 0.083                                | >10   | >10    | >10   | >10       | >10         | 1-69   | 96.9                    | 3                      | 15                     | K3-20  | 99.0                    | 1                      | 9     | COV072       | 5                      |
| 27 | C210         | RBD     | 0.058                                | >10   | >10    | >10   | >10       | >10         | 3-53   | 97.9                    | 2                      | 11                     | K1-9   | 100.0                   | 0                      | 10    | COV96        | 5                      |
| 28 | CC6.31       | RBD     | 0.035                                | >10   | >10    | >10   | >10       | >10         | 1-46   | 94.9                    | 5                      | 12                     | K1-17  | 100.0                   | 0                      | 10    | CC6          | 6                      |
| 29 | CC6.33       | RBD     | 0.062                                | >10   | >10    | >10   | >10       | >10         | 1-69   | 95.9                    | 4                      | 11                     | K3-20  | 98.9                    | 1                      | 9     | CC6          | 6                      |
| 30 | CC12.4       | RBD     | 4.951                                | >10   | >10    | >10   | >10       | >10         | 1-2    | 96.9                    | 3                      | 19                     | L2-8   | 96.0                    | 4                      | 10    | CC12         | 6                      |
| 31 | CnC21p1_B4   | RBD     | 0.173                                | >10   | >10    | >10   | >10       | >10         | 1-18   | 100.0                   | 0                      | 12                     | L2-23  | 99.0                    | 1                      | 10    | CnC2         | 7                      |
| 32 | CnC21p1_D6   | RBD     | 1.726                                | >10   | >10    | >10   | >10       | >10         | 3-49   | 100.0                   | 0                      | 17                     | K2-28  | 100.0                   | 0                      | 9     | CnC2         | 7                      |
| 33 | CnC21p1_E8   | RBD     | 0.449                                | >10   | >10    | >10   | >10       | >10         | 1-2    | 85.7                    | 14                     | 13                     | L2-23  | 90.9                    | 9                      | 10    | CnC2         | 7                      |
| 34 | CnC21p1_E12  | RBD     | 1.175                                | >10   | >10    | >10   | >10       | >10         | 3-49   | 99.0                    | 1                      | 17                     | K2-28  | 100.0                   | 0                      | 9     | CnC2         | 7                      |
| 35 | CnC21p1_G6   | RBD     | 5.616                                | >10   | >10    | >10   | >10       | >10         | 1-2    | 85.7                    | 14                     | 13                     | L2-23  | 89.9                    | 10                     | 10    | CnC2         | 7                      |
| 36 | COV2-2050    | RBD     | <0.005                               | >10   | >10    | >10   | >10       | >10         | 1-2    | 95.9                    | 4                      | 23                     | L1-44  | 94.8                    | 5                      | 11    | n.a.         | 8                      |
| 37 | COV2-2064    | RBD     | 0.500                                | >10   | >10    | >10   | >10       | >10         | 1-8    | 91.8                    | 8                      | 16                     | L1-44  | 91.8                    | 8                      | 11    | n.a.         | 8                      |
| 38 | COV2-2068    | RBD     | 0.045                                | 1.283 | 0.968  | 1.330 | 0.821     | 0.497       | 3-53   | 93.8                    | 6                      | 16                     | L1-40  | 96.0                    | 4                      | 12    | n.a.         | 8                      |
| 39 | COV2-2098    | RBD     | 0.006                                | >10   | >10    | >10   | >10       | >10         | 3-23   | 87.9                    | 11                     | 11                     | K3-15  | 91.6                    | 8                      | 9     | n.a.         | 8                      |
| 40 | COV2-2130    | RBD     | <0.005                               | 6.848 | >10    | 0.008 | 0.014     | 0.085       | 3-15   | 96.0                    | 4                      | 22                     | K4-1   | 96.0                    | 4                      | 8     | n.a.         | 8                      |
| 41 | COV2-2196    | RBD     | <0.005                               | >10   | >10    | >10   | >10       | >10         | 1-58   | 98.0                    | 2                      | 16                     | K3-20  | 98.9                    | 1                      | 10    | n.a.         | 8                      |
| 42 | COV2-2268    | RBD     | 0.510                                | >10   | >10    | 3.324 | 4.248     | 4.071       | 2-5    | 98.0                    | 2                      | 11                     | L2-14  | 97.0                    | 3                      | 11    | n.a.         | 8                      |
| 43 | COV2-2308    | RBD     | 0.007                                | >10   | >10    | >10   | >10       | >10         | 3-23   | 87.9                    | 11                     | 10                     | K3-15  | 91.6                    | 8                      | 9     | n.a.         | 8                      |
| 44 | COV2-2354    | RBD     | 0.458                                | >10   | >10    | >10   | >10       | >10         | 3-53   | 89.6                    | 10                     | 12                     | L6-57  | 100.0                   | 0                      | 10    | n.a.         | 8                      |
| 45 | COV2-2381    | RBD     | 0.008                                | >10   | >10    | >10   | >10       | >10         | 1-58   | 98.0                    | 2                      | 16                     | K3-20  | 95.8                    | 4                      | 10    | n.a.         | 8                      |
| 46 | COV2-2479    | RBD     | <0.005                               | >10   | >10    | >10   | >10       | >10         | 1-69   | 90.8                    | 9                      | 14                     | K3-15  | 96.8                    | 3                      | 8     | n.a.         | 8                      |
| 47 | COV2-2499    | RBD     | 0.012                                | >10   | >10    | >10   | >10       | >10         | 4-39   | 98.0                    | 2                      | 19                     | L3-19  | 95.8                    | 4                      | 11    | n.a.         | 8                      |
| 48 | COV2-2531    | RBD     | 0.366                                | >10   | >10    | >10   | >10       | >10         | 4-59   | 90.7                    | 9                      | 12                     | L6-57  | 95.9                    | 4                      | 9     | n.a.         | 8                      |
| 49 | COV2-2539    | RBD     | 0.562                                | >10   | >10    | >10   | >10       | >10         | 1-8    | 94.9                    | 5                      | 16                     | L1-44  | 92.9                    | 7                      | 11    | n.a.         | 8                      |
| 50 | COV2-2562    | RBD     | 0.427                                | >10   | >10    | >10   | >10       | >10         | 1-8    | 91.8                    | 8                      | 16                     | L1-44  | 91.8                    | 8                      | 11    | n.a.         | 8                      |
| 51 | COV2-2677    | RBD     | 3.904                                | >10   | >10    | >10   | >10       | >10         | 4-39   | 99.0                    | 1                      | 12                     | L6-57  | 100.0                   | 0                      | 10    | n.a.         | 8                      |
| 52 | COV2-2678    | RBD     | 0.009                                | >10   | >10    | >10   | >10       | >10         | 3-20   | 94.8                    | 5                      | 22                     | L3-19  | 96.8                    | 3                      | 11    | n.a.         | 8                      |
| 53 | COV2-2752    | RBD     | 0.028                                | >10   | >10    | >10   | >10       | >10         | 3-53   | 95.9                    | 4                      | 10                     | K1-33  | 97.9                    | 2                      | 9     | n.a.         | 8                      |
| 54 | COV2-2841    | RBD     | 0.345                                | >10   | >10    | >10   | >10       | >10         | 4-59   | 94.8                    | 5                      | 12                     | L6-57  | 98.0                    | 2                      | 9     | n.a.         | 8                      |
| 55 | COV2-2919    | RBD     | 0.071                                | >10   | >10    | >10   | >10       | >10         | 2-70   | 97.0                    | 3                      | 12                     | K1-39  | 94.7                    | 5                      | 9     | n.a.         | 8                      |
| 56 | COV2-2952    | RBD     | 0.010                                | >10   | >10    | >10   | >10       | >10         | 3-66   | 93.8                    | 6                      | 11                     | K1-9   | 94.7                    | 5                      | 9     | n.a.         | 8                      |
| 57 | COV2-2955    | RBD     | 0.018                                | >10   | >10    | >10   | >10       | >10         | 3-30   | 95.9                    | 4                      | 22                     | K2D-29 | 98.0                    | 2                      | 9     | n.a.         | 8                      |
| 58 | COVA2-29     | RBD     | 0.837                                | >10   | >10    | >10   | >10       | >10         | 3-30   | 97.9                    | 2                      | 18                     | K1-39  | 98.9                    | 1                      | 9     | COSCA2       | 9                      |
| 59 | CV-X2-106    | RBD     | 0.088                                | >10   | >10    | >10   | >10       | >10         | 1-69   | 100.0                   | 0                      | 18                     | K1-39  | 97.9                    | 2                      | 9     | CV-X2        | 10                     |
| 60 | CV07-262     | RBD     | 0.005                                | >10   | >10    | >10   | >10       | >10         | 1-2    | 96.9                    | 3                      | 22                     | L2-23  | 98.0                    | 2                      | 10    | CV07         | 10                     |
| 61 | CV07-270     | RBD     | 0.016                                | >10   | >10    | >10   | >10       | >10         | 3-11   | 99.0                    | 1                      | 22                     | L2-14  | 98.0                    | 2                      | 10    | CV07         | 10                     |
| 62 | CV38-139     | RBD     | 0.039                                | >10   | >10    | >10   | >10       | >10         | 3-66   | 97.9                    | 2                      | 10                     | K1-9   | 100.0                   | 0                      | 10    | CV38         | 10                     |
| 63 | CV38-142     | RBD     | 1.285                                | >10   | >10    | >10   | >10       | >10         | 5-51   | 95.9                    | 4                      | 16                     | K1-39  | 100.0                   | 0                      | 11    | CV38         | 10                     |
| 64 | DH1042       | RBD     | 0.008                                | >10   | >10    | >10   | >10       | >10         | 1-69   | 96.9                    | 3                      | 16                     | K1-39  | 97.9                    | 2                      | 9     | Donor 26     | 11                     |
| 65 | DH1128       | RBD     | 3.146                                | >10   | >10    | >10   | >10       | >10         | 3-23   | 88.8                    | 11                     | 8                      | K6-21  | 94.7                    | 5                      | 9     | Donor 26     | 11                     |
| 66 | DH1138       | SI*     | 2.256                                | >10   | >10    | >10   | >10       | >10         | 4-61   | 97.0                    | 3                      | 12                     | K3-11  | 97.9                    | 2                      | 8     | Donor 26     | 11                     |
| 67 | DH1184       | RBD     | 0.007                                | >10   | >10    | >10   | >10       | >10         | 1-69   | 95.9                    | 4                      | 18                     | K3-20  | 100.0                   | 0                      | 9     | Donor 26     | 11                     |
| 68 | DH1210       | RBD     | 0.421                                | >10   | >10    | >10   | >10       | >10         | 1-69-2 | 91.8                    | 8                      | 12                     | L1-47  | 91.8                    | 8                      | 12    | Donor 26     | 11                     |
| 69 | DZIF-10c     | RBD     | <0.005                               | 0.046 | >10    | 0.033 | 0.034     | 8.638       | 3-30   | 88.8                    | 11                     | 13                     | K1-5   | 89.4                    | 10                     | 9     | HbnC3        | 7                      |
| 70 | Etesevimab   | RBD     | 0.018                                | >10   | >10    | >10   | >10       | >10         | 3-66   | 96.9                    | 3                      | 13                     | K1-39  | 97.9                    | 2                      | 11    | n.a.         | 12                     |
| 71 | FnC112p1_G4  | RBD     | 0.008                                | >10   | >10    | >10   | >10       | >10         | 7-4-1  | 93.9                    | 6                      | 11                     | K1-33  | 96.8                    | 3                      | 9     | FnC1         | 7                      |
| 72 | FnC112p1_G5  | RBD     | 0.012                                | >10   | >10    | >10   | >10       | >10         | 7-4-1  | 93.9                    | 6                      | 11                     | K1-33  | 96.8                    | 3                      | 9     | FnC1         | 7                      |
| 73 | GW01         | RBD     | 0.072                                | >10   | >10    | >10   | >10       | >10         | 3-43   | 94.9                    | 5                      | 20                     | L1-44  | 100.0                   | 0                      | 10    | n.a.         | 13                     |
| 74 | HbnC21p2_D9  | RBD     | 0.046                                | >10   | >10    | >10   | >10       | >10         | 3-33   | 95.9                    | 4                      | 19                     | K3-11  | 97.9                    | 2                      | 11    | HbnC2        | 7                      |
| 75 | HbnC31p1_C6  | RBD     | <0.005                               | 9.482 | >10    | >10   | >10       | >10         | 1-58   | 100.0                   | 0                      | 16                     | K3-20  | 99.0                    | 1                      | 9     | HbnC3        | 7                      |
| 76 | HbnC31p1_G4  | RBD     |                                      |       |        |       |           |             |        |                         |                        |                        |        |                         |                        |       |              |                        |

**Table S2 - Human monoclonal antibody panel analysis, Related to Figure 3 (continued)**

| #   | Name      | Epitope | Pseudovirus IC <sub>50</sub> (µg/ml) |        |        |        |           | Heavy chain |        |                         |                        | Light chain            |        |                         |                        | Donor | Ref.      |                        |
|-----|-----------|---------|--------------------------------------|--------|--------|--------|-----------|-------------|--------|-------------------------|------------------------|------------------------|--------|-------------------------|------------------------|-------|-----------|------------------------|
|     |           |         | Wu01                                 | BA.1   | BA.1.1 | BA.2   | BA.2.12.1 | BA.4/5      | V gene | GL id. (%) <sup>a</sup> | # aa mut. <sup>b</sup> | CDR3 # aa <sup>c</sup> | V gene | GL id. (%) <sup>a</sup> | # aa mut. <sup>b</sup> |       |           | CDR3 # aa <sup>c</sup> |
| 91  | P2B-2F6   | RBD     | 0.035                                | >10    | >10    | >10    | >10       | >10         | 4-38-2 | 99.0                    | 1                      | 20                     | L2-8   | 100.0                   | 0                      | 10    | P2        | 17                     |
| 92  | P2C-1F11  | RBD     | 0.008                                | >10    | >10    | >10    | 5.398     | 0.820       | 3-66   | 95.9                    | 4                      | 11                     | K3-20  | 100.0                   | 0                      | 8     | P2        | 17                     |
| 93  | R40-1A1   | RBD     | 0.007                                | >10    | >10    | >10    | >10       | >10         | 1-18   | 83.7                    | 16                     | 17                     | K2-40  | 95.1                    | 5                      | 9     | R40       | 18                     |
| 94  | R40-1A8   | RBD     | <0.005                               | >10    | >10    | 0.729  | 0.295     | 0.226       | 3-43   | 93.9                    | 6                      | 16                     | L2-14  | 94.9                    | 5                      | 10    | R40       | 18                     |
| 95  | R40-1B4   | RBD     | <0.005                               | >10    | >10    | >10    | >10       | >10         | 1-2    | 90.8                    | 9                      | 23                     | L1-40  | 94.8                    | 5                      | 9     | R40       | 18                     |
| 96  | R40-1B9   | RBD     | 0.012                                | >10    | >10    | >10    | >10       | >10         | 2-70   | 96.0                    | 4                      | 11                     | K1-39  | 95.8                    | 4                      | 9     | R40       | 18                     |
| 97  | R40-1C8   | RBD     | 0.012                                | 0.079  | 0.085  | 0.032  | 0.027     | 5.324       | 3-53   | 93.8                    | 6                      | 11                     | K1-9   | 97.9                    | 2                      | 10    | R40       | 18                     |
| 98  | R40-1D3   | RBD     | <0.005                               | >10    | 8.296  | <0.005 | <0.005    | <0.005      | 3-23   | 88.8                    | 11                     | 14                     | L2-14  | 93.9                    | 6                      | 10    | R40       | 18                     |
| 99  | R40-1E1   | RBD     | 0.214                                | >10    | 6.880  | >10    | >10       | >10         | 3-33   | 94.9                    | 5                      | 24                     | K3-20  | 96.9                    | 3                      | 9     | R40       | 18                     |
| 100 | R40-1E4   | RBD     | <0.005                               | >10    | >10    | >10    | >10       | >10         | 1-2    | 95.9                    | 4                      | 13                     | K3-20  | 93.7                    | 6                      | 8     | R40       | 18                     |
| 101 | R40-1G6   | S1*     | 0.823                                | 0.546  | 0.592  | 0.263  | 0.394     | 0.396       | 3-33   | 89.8                    | 10                     | 15                     | K1-39  | 93.7                    | 6                      | 9     | R40       | 18                     |
| 102 | R40-1G8   | RBD     | <0.005                               | 0.495  | 0.575  | 1.178  | 0.497     | 0.692       | 3-53   | 91.8                    | 8                      | 11                     | K1-9   | 97.8                    | 2                      | 9     | R40       | 18                     |
| 103 | R40-1G12  | RBD     | 0.023                                | >10    | >10    | >10    | >10       | >10         | 1-2    | 100.0                   | 0                      | 17                     | L2-14  | 99.0                    | 1                      | 12    | R40       | 18                     |
| 104 | R40-1H4   | RBD     | <0.005                               | >10    | >10    | >10    | >10       | >10         | 1-2    | 90.8                    | 9                      | 15                     | L2-11  | 97.9                    | 2                      | 9     | R40       | 18                     |
| 105 | R121-1F1  | RBD     | <0.005                               | 3.935  | 1.827  | 0.014  | 0.029     | 0.045       | 3-30   | 90.8                    | 9                      | 14                     | L1-40  | 91.9                    | 8                      | 11    | R121      | 18                     |
| 106 | R121-3F7  | RBD     | 0.055                                | >10    | >10    | >10    | >10       | >10         | 4-61   | 97.0                    | 3                      | 19                     | L1-40  | 95.9                    | 4                      | 11    | R121      | 18                     |
| 107 | R121-3F11 | RBD     | 0.406                                | 0.667  | 0.845  | 0.800  | 2.209     | >10         | 4-59   | 88.7                    | 11                     | 20                     | L1-40  | 96.0                    | 4                      | 11    | R121      | 18                     |
| 108 | R121-3G2  | RBD     | 0.292                                | 4.288  | 3.543  | >10    | >10       | >10         | 4-39   | 87.9                    | 12                     | 21                     | K3-20  | 88.5                    | 11                     | 9     | R121      | 18                     |
| 109 | R200-1B8  | RBD     | 0.008                                | >10    | >10    | >10    | >10       | >10         | 4-31   | 91.9                    | 8                      | 19                     | L1-40  | 95.9                    | 4                      | 11    | R200      | 18                     |
| 110 | R200-1B9  | RBD     | <0.005                               | 0.038  | 0.052  | 0.092  | 0.032     | >10         | 1-58   | 93.9                    | 6                      | 16                     | K3-20  | 94.8                    | 5                      | 9     | R200      | 18                     |
| 111 | R200-1F9  | RBD     | <0.005                               | 0.023  | 0.025  | 0.026  | 0.017     | 0.017       | 3-48   | 90.8                    | 9                      | 15                     | K3-11  | 94.7                    | 5                      | 9     | R200      | 18                     |
| 112 | R200-1G11 | RBD     | <0.005                               | >10    | >10    | >10    | >10       | >10         | 4-31   | 94.9                    | 5                      | 18                     | K1-39  | 92.6                    | 7                      | 9     | R200      | 18                     |
| 113 | R200-4F4  | RBD     | 0.008                                | >10    | >10    | >10    | >10       | >10         | 1-69   | 93.9                    | 6                      | 25                     | K1-33  | 97.9                    | 2                      | 9     | R200      | 18                     |
| 114 | R207-1C1  | RBD     | <0.005                               | >10    | >10    | >10    | >10       | >10         | 1-69   | 86.7                    | 13                     | 14                     | K3-15  | 98.9                    | 1                      | 8     | R207      | 18                     |
| 115 | R207-1C4  | RBD     | 0.016                                | >10    | >10    | >10    | >10       | >10         | 3-53   | 91.8                    | 8                      | 11                     | K1-9   | 96.8                    | 3                      | 8     | R207      | 18                     |
| 116 | R207-1G1  | RBD     | 0.102                                | >10    | >10    | >10    | >10       | >10         | 1-18   | 93.9                    | 6                      | 12                     | L2-23  | 99.0                    | 1                      | 10    | R207      | 18                     |
| 117 | R207-2A6  | RBD     | 0.014                                | 2.575  | 4.952  | 2.528  | 1.599     | 1.850       | 3-53   | 89.7                    | 10                     | 11                     | K3-15  | 98.9                    | 1                      | 9     | R207      | 18                     |
| 118 | R207-2A10 | RBD     | <0.005                               | >10    | >10    | >10    | >10       | >10         | 1-8    | 92.9                    | 7                      | 15                     | L2-23  | 99.0                    | 1                      | 11    | R207      | 18                     |
| 119 | R207-2C2  | RBD     | 0.010                                | >10    | >10    | >10    | >10       | >10         | 3-53   | 91.8                    | 8                      | 12                     | L2-8   | 93.8                    | 6                      | 10    | R207      | 18                     |
| 120 | R207-2F11 | RBD     | <0.005                               | <0.005 | 0.006  | 0.006  | <0.005    | 0.011       | 3-53   | 89.7                    | 10                     | 11                     | K1-33  | 90.5                    | 9                      | 9     | R207      | 18                     |
| 121 | R207-2G4  | RBD     | 0.021                                | 0.052  | 0.079  | 0.239  | 0.201     | 0.303       | 3-53   | 92.8                    | 7                      | 11                     | K1-9   | 90.4                    | 9                      | 5     | R207      | 18                     |
| 122 | R207-2H1  | RBD     | <0.005                               | >10    | >10    | >10    | >10       | >10         | 1-46   | 88.8                    | 11                     | 18                     | L1-40  | 91.7                    | 8                      | 12    | R207      | 18                     |
| 123 | R259-1B9  | RBD     | <0.005                               | 0.369  | 0.262  | 0.614  | 0.211     | >10         | 1-58   | 91.8                    | 8                      | 16                     | K3-20  | 94.8                    | 5                      | 9     | R259      | 18                     |
| 124 | R339-1B11 | RBD     | <0.005                               | 1.090  | 1.946  | 0.161  | >10       | >10         | 3-7    | 88.8                    | 11                     | 16                     | K2-28  | 97.0                    | 3                      | 9     | R339      | 18                     |
| 125 | R339-3B5  | S2      | 1.158                                | 5.954  | 4.139  | 3.596  | >10       | >10         | 1-46   | 81.6                    | 18                     | 11                     | K3-20  | 92.7                    | 7                      | 11    | R339      | 18                     |
| 126 | R339-3C6  | S1*     | 2.657                                | >10    | >10    | >10    | >10       | >10         | 4-59   | 92.8                    | 7                      | 20                     | K2D-29 | 89.0                    | 11                     | 9     | R339      | 18                     |
| 127 | R410-1A8  | RBD     | 0.347                                | 0.507  | 0.610  | 1.304  | 3.547     | 2.394       | 2-5    | 92.9                    | 7                      | 15                     | K1D-12 | 94.7                    | 5                      | 9     | R410      | 18                     |
| 128 | R568-1A9  | RBD     | <0.005                               | 7.558  | >10    | 0.013  | 0.014     | >10         | 1-69   | 88.8                    | 11                     | 17                     | K1-5   | 94.7                    | 5                      | 10    | R568      | 18                     |
| 129 | R568-1B3  | RBD     | 0.010                                | 2.954  | 1.954  | >10    | 1.678     | 1.829       | 3-53   | 91.8                    | 8                      | 11                     | K1-9   | 94.6                    | 5                      | 9     | R568      | 18                     |
| 130 | R568-1C6  | RBD     | <0.005                               | >10    | >10    | 0.017  | 1.862     | >10         | 1-69   | 92.8                    | 7                      | 18                     | K1-5   | 97.9                    | 2                      | 10    | R568      | 18                     |
| 131 | R568-1E8  | RBD     | 0.048                                | >10    | >10    | >10    | >10       | >10         | 3-53   | 96.9                    | 3                      | 11                     | K1-9   | 96.8                    | 3                      | 9     | R568      | 18                     |
| 132 | R568-1G9  | RBD     | 0.007                                | 0.006  | 0.006  | 0.005  | <0.005    | 0.045       | 3-66   | 96.9                    | 3                      | 12                     | L1-40  | 99.0                    | 1                      | 10    | R568      | 18                     |
| 133 | R568-2A1  | RBD     | 0.295                                | >10    | >10    | >10    | >10       | >10         | 3-11   | 95.9                    | 4                      | 15                     | L1-47  | 99.0                    | 1                      | 11    | R568      | 18                     |
| 134 | R568-2A3  | RBD     | <0.005                               | >10    | >10    | >10    | >10       | >10         | 1-2    | 89.8                    | 10                     | 15                     | L2-8   | 97.0                    | 3                      | 10    | R568      | 18                     |
| 135 | R568-2B9  | RBD     | 0.014                                | >10    | >10    | >10    | >10       | >10         | 3-53   | 89.7                    | 10                     | 11                     | K1-9   | 95.8                    | 4                      | 10    | R568      | 18                     |
| 136 | R568-2B11 | RBD     | 0.014                                | 2.638  | 2.624  | 3.749  | 0.609     | 0.416       | 3-53   | 93.8                    | 6                      | 11                     | K1-9   | 95.8                    | 4                      | 10    | R568      | 18                     |
| 137 | R568-2E1  | RBD     | 0.006                                | >10    | >10    | >10    | >10       | >10         | 3-53   | 93.8                    | 6                      | 11                     | K1-9   | 97.8                    | 2                      | 9     | R568      | 18                     |
| 138 | R568-2E7  | S1*     | 0.007                                | >10    | >10    | 0.009  | 0.007     | <0.005      | 3-23   | 90.7                    | 9                      | 8                      | K3-15  | 97.9                    | 2                      | 10    | R568      | 18                     |
| 139 | R568-2F1  | RBD     | 0.009                                | >10    | >10    | >10    | >10       | >10         | 1-69   | 89.7                    | 10                     | 17                     | L1-47  | 94.8                    | 5                      | 12    | R568      | 18                     |
| 140 | R568-2G5  | RBD     | 0.006                                | 0.684  | 0.973  | 1.648  | 0.640     | 2.122       | 3-53   | 91.8                    | 8                      | 11                     | K1-9   | 95.8                    | 4                      | 11    | R568      | 18                     |
| 141 | R568-2G11 | RBD     | <0.005                               | 0.042  | >10    | 0.007  | 0.012     | 0.006       | 3-15   | 92.0                    | 8                      | 15                     | K1-8   | 95.8                    | 4                      | 9     | R568      | 18                     |
| 142 | R616-1A11 | RBD     | 0.037                                | >10    | >10    | >10    | >10       | >10         | 1-69   | 88.7                    | 11                     | 16                     | K1-5   | 93.7                    | 6                      | 11    | R616      | 18                     |
| 143 | R616-1D6  | RBD     | 3.278                                | >10    | >10    | >10    | >10       | >10         | 4-34   | 83.5                    | 16                     | 20                     | K1-39  | 90.5                    | 9                      | 9     | R616      | 18                     |
| 144 | R616-1F10 | RBD     | 0.052                                | >10    | >10    | >10    | >10       | >10         | 3-30   | 86.7                    | 13                     | 17                     | L1-44  | 94.9                    | 5                      | 12    | R616      | 18                     |
| 145 | R616-1G4  | RBD     | 0.005                                | >10    | >10    | >10    | >10       | >10         | 3-53   | 96.9                    | 3                      | 15                     | L2-14  | 97.0                    | 3                      | 12    | R616      | 18                     |
| 146 | R849-1C11 | RBD     | 0.409                                | 1.811  | 2.062  | 7.581  | 5.386     | 5.023       | 4-30-4 | 94.9                    | 5                      | 27                     | L2-18  | 97.0                    | 3                      | 10    | R849      | 18                     |
| 147 | R849-1G7  | RBD     | <0.005                               | >10    | >10    | >10    | >10       | >10         | 1-2    | 90.8                    | 9                      | 16                     | L2-23  | 91.8                    | 8                      | 10    | R849      | 18                     |
| 148 | R849-1H1  | RBD     | 0.132                                | >10    | >10    | >10    | >10       | >10         | 3-33   | 96.9                    | 3                      | 20                     | K1-39  | 96.8                    | 3                      | 10    | R849      | 18                     |
| 149 | R849-3H2  | RBD     | 0.013                                | >10    | >10    | >10    | >10       | >10         | 3-30   | 92.9                    | 7                      | 14                     | K1-39  | 97.9                    | 2                      | 8     | R849      | 18                     |
| 150 | REGN10954 | RBD     | 0.009                                | 1.641  | 1.583  | 0.117  | 0.046     | 0.212       | 3-66   | 96.9                    | 3                      | 13                     | K1-33  | 94.7                    | 5                      | 9     | Donor_3   | 14                     |
| 151 | REGN10955 | RBD     | 0.017                                | >10    | >10    | 1.319  | 0.212     | 0.857       | 3-66   | 95.9                    | 4                      | 9                      | K1-33  | 97.9                    | 2                      | 9     | Donor_3   | 14                     |
| 152 | REGN10964 | RBD     | <0.005                               | >10    | >10    | >10    | >10       | >10         | 4-59   | 94.8                    | 5                      | 12                     | K1-39  | 93.7                    | 6                      | 9     | Donor_1   | 14                     |
| 153 | REGN10970 | RBD     | 0.014                                | >10    | >10    | >10    | >10       | >10         | 3-66   | 96.9                    | 3                      | 14                     | K1-33  | 98.9                    | 1                      | 9     | Donor_1   | 14                     |
| 154 | REGN10971 | RBD     | 0.008                                | >10    | >10    | 5.290  | 1.046     | >10         | 3-53   | 95.9                    | 4                      | 11                     | K1-9   | 97.9                    | 2                      | 10    | Donor_1   | 14                     |
| 155 | REGN10977 | RBD     | <0.005                               | >10    | >10    | >10    | >10       | >10         | 1-69   | 95.9                    | 4                      | 16                     | K3-20  | 95.8                    | 4                      | 9     | Donor_1   | 14                     |
| 156 | REGN10986 | RBD     | 0.006                                | 0.381  | 0.192  | >10    | 0.885     | >10         | 3-66   | 97.9                    | 2                      | 13                     | L1-40  | 98.0                    | 2                      | 12    | Donor_1   | 14                     |
| 157 | REGN10989 | RBD     | <0.005                               | >10    | >10    | >10    | >10       | >10         | 1-2    | 93.9                    | 6                      | 16                     | L2-14  | 92.9                    | 7                      | 10    | Donor_3   | 14                     |
| 158 | S2X35     | RBD     | 0.057                                | >10    | >10    | >10    | >10       | >10         | 1-18   | 98.0                    | 2                      | 21                     | L1-40  | 99.0                    | 1                      | 13    | Donor S2X | 19                     |

a Amino acid identity relative to germline gene (framework region 1 to framework region 3).  
b Number of amino acid mutations relative to germline gene (framework region 1 to framework region 3).  
c Length of CDR3 in amino acids.  
\* Indicates epitope in S1 domain of SARS-CoV-2 spike protein outside of receptor-binding domain (e.g., N-terminal domain).  
n.a. Indicates that donor ID was not unambiguously identified.  
RBD Receptor-binding domain.  
Ref. References:

1, Liu L. et al., 2020; 2, Wu Y. et al., 2020; 3, Jones B.E. et al., 2021; 4, Cao Y. et al., 2020; 5, Robbiani D.F. et al., 2020; 6, Rogers T.F. et al., 2020; 7, Kreer C. et al., 2020; 8, Zost S.J. et al., 2020; 9, Brouwer P.J.M. et al., 2020; 10, Kreye J. et al., 2020; 11, Li D. et al., 2021; 12, Shi R. et al., 2020; 13, Wang Y. et al., 2022; 14, Hansen J. et al., 2020; 15, Westendorp K. et al., 2022; 16, Andreano E. et al., 2021; 17, Ju B. et al., 2020; 18, Vanshilla K. et al., 2022; 19, Piccoli L. et al., 2020.
